# Supplementary material
Source: publisher figshare collection journal article supplement (https://tandf.figshare.com/articles/dataset/_/1332512)
Supplement: Supplementary file 1 [file 1]

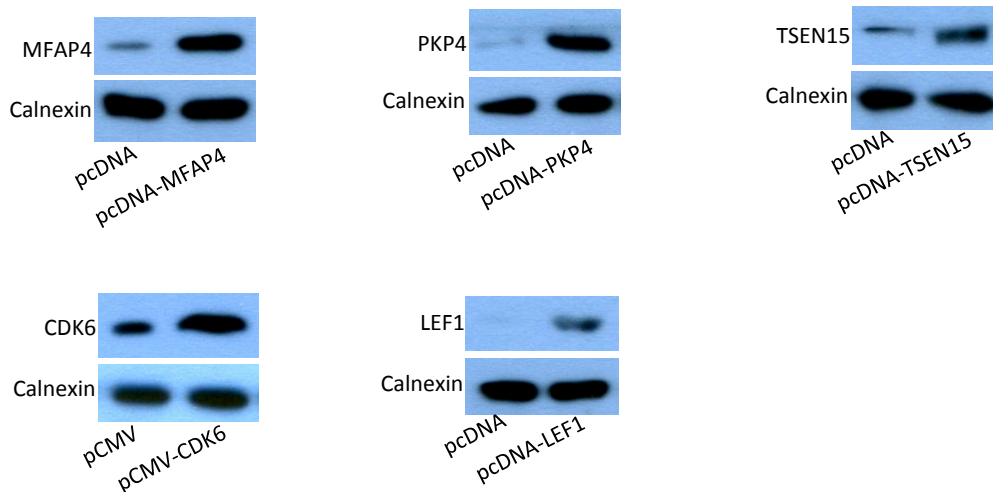

**Suppl. Figure 6. Protein overexpression levels by the expression vectors in BE(2)-C cells.** Cells were transfected with either the empty vector (pcDNA or pCMV) or the indicated gene expression vector (1 $\mu$ g/ml). After 2 days, cells lysates were collected and the expression levels of the indicated proteins were detected by the corresponding antibodies by Western blot, with calnexin level as a loading control.
