# Supplementary material
Source: publisher figshare collection journal article supplement (https://tandf.figshare.com/articles/dataset/_/1332512)
Supplement: Supplementary file 2 [file 1]

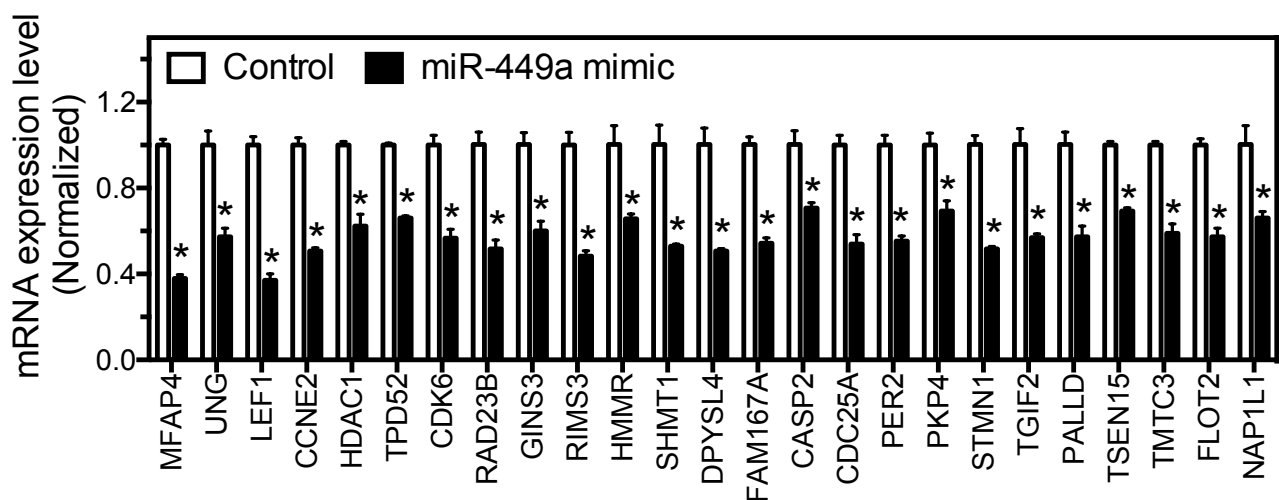

**Suppl. Figure 3. Down-regulation of the 25 target genes by miR-449a mimic.** We used qPCR to validate the 25 predicated target genes of miR-449a that were identified as down-regulated greater than 40% by miR-449a mimic. BE(2)-C cells were transfected with miR-449a (25 nM) mimic or control oligos (Control) for 24 hours. Total RNAs were collected and the mRNA levels were measured by qPCR. Shown are the relative mRNA levels of the individual genes associated with miR-449a mimic normalized to those associated with the Control. GAPDH was used as a loading control. \*,  $p < 0.05$  comparing to control.
