# Supplementary material
Source: publisher figshare collection journal article supplement (https://tandf.figshare.com/articles/dataset/_/1332512)
Supplement: Supplementary file 3 [file 1]

| Cell line | Age | Gender | Stage | Chr 1p alteration | Chr 17 alteration | MYCN ampl. |
|-----------|-----|--------|-------|-------------------|-------------------|------------|
| BE(2)-C   | 2   | male   | 4     | Y                 | N                 | Y          |
| SK-N-BE   | 1.8 | male   | 4     | Y                 | N                 | Y          |
| LAN6      | 5.8 | male   | 4     | N                 | unk               | N          |
| BE(2)-M17 | 2   | male   | 4     | Y                 | N                 | Y          |
| KELLY     | unk | unk    | unk   | unk               | unk               | Y          |

**Suppl. Table 1. Genetic backgrounds of neuroblastoma cell lines used in the study.** Shown are the name of the cell line, age and gender of the patient, stage of the tumor from which the cell lines are derived, chromosome 1p and 17 alterations, and MYCN gene amplification status. \*unk, unknown; Chr, Chromosome; ampl, amplification.
