# Supplementary material
Source: publisher figshare collection journal article supplement (https://tandf.figshare.com/articles/dataset/_/1332512)
Supplement: Supplementary file 4 [file 1]

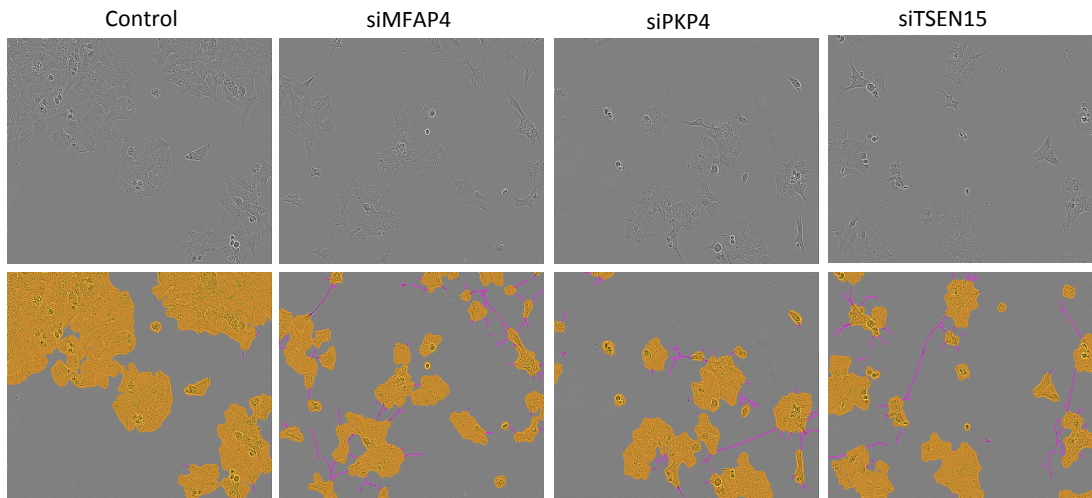

**Suppl. Figure 5. Representative images showing the effect of knockdown of miR-449a targets on neurite outgrowth in BE(2)-C cells.** Shown are the images analyzed to define neurite (pink) and cell body areas (yellow).
