# Supplementary material
Source: publisher figshare collection journal article supplement (https://tandf.figshare.com/articles/dataset/_/1332512)
Supplement: Supplementary file 5 [file 1]

| GENE name     | Fold change | Reference    |
|---------------|-------------|--------------|
| BCL2          | 0.96        | 1, 2         |
| CCND1         | 1.36        | 2, 6, 8, 13  |
| <b>CCNE2</b>  | <b>0.48</b> | 8, 12        |
| <b>CDC25A</b> | <b>0.56</b> | 8, 9, 15     |
| <b>CDK4</b>   | <b>0.58</b> | 8            |
| <b>CDK6</b>   | <b>0.50</b> | 8, 9, 14, 15 |
| CRHR1         | 1.04        | 4            |
| DLL1          | 0.96        | 10           |
| E2F1          | 0.86        | 14           |
| E2F3          | 0.72        | 3, 6         |
| <b>GMNN</b>   | <b>0.54</b> | 12           |
| <b>HDAC1</b>  | <b>0.49</b> | 8, 13, 16    |
| <b>LEF1</b>   | <b>0.49</b> | 7            |
| MET           | 1.03        | 5, 12        |
| MYC           | 1.03        | 8            |
| MYCN          | 1.00        | 11           |
| Notch1        | 0.94        | 10           |
| <b>SIRT1</b>  | <b>0.64</b> | 12, 14       |
| WISP2         | 1.09        | 17           |

## References

- 1 Wei B, *et al.* Oncol Lett, 2013, 6(6):1713-1718.
- 2 Hu J, *et al.* Dig Dis Sci. 2013, 59(2):336-45.
- 3 Ren XS, *et al.* Cancer Lett 2014, 344(2):195-203.
- 4 Nemoto T, *et al.* Mol Endocrinol, 2013, 27(10): 1593-1602
- 5 Luo W, *et al.* PLoS one, 2013, 29(8):e64759.
- 6 Fang Y, *et al.* Oncol Rep 2013, 30(1):399-406.
- 7 Paik S, *et al.* Stem Cells Dev 2012, 21(18): 3298-308
- 8 Bao J, *et al.* JBC 2012, 287(26):21686-98.
- 9 Chen H, *et al.* Cancer Lett 2012, 320(1):40-7.
- 10 Marcet B, *et al.* Nat Cell Biol 2011, 13(6):693-9.
- 11 Buechner J, *et al.* Br J Cancer 2011, 105(2): 296-303.
- 12 Bou Kheir T, *et al.* Mol Cancer 2011, 10:29
- 13 Noonan EJ, *et al.* Oncotarget, 2010, 1(5):349-58.
- 14 Lize M, *et al.* Cell Death Differ 2010, 17(3):452-8.
- 15 Yang X, *et al.* Genes Dev. 2009, 23(20):2388-93.
- 16 Nooan EJ, *et al.* Oncogene 2009, 28(14):1714-24.
- 17 Iliopoulos D, *et al.* Cancer Res, 2009, 69(8): 3278-82.

**Suppl. Table 3. Effect of miR-449a overexpression on expression of previously reported miR-449a targets.** BE(2)-C cells were transfected with 25nM of miR-449a mimic or control oligo for 24 hours, and mRNA expression levels were determined by gene expression microarray analysis. Shown are the gene symbol, fold change of expression at mRNA level induced by miR-449a overexpression (with genes that are down-regulated by >30% bolded), and reference associated with each gene.
