# Supplementary material
Source: publisher figshare collection journal article supplement (https://tandf.figshare.com/articles/dataset/_/1332512)
Supplement: Supplementary file 6 [file 1]

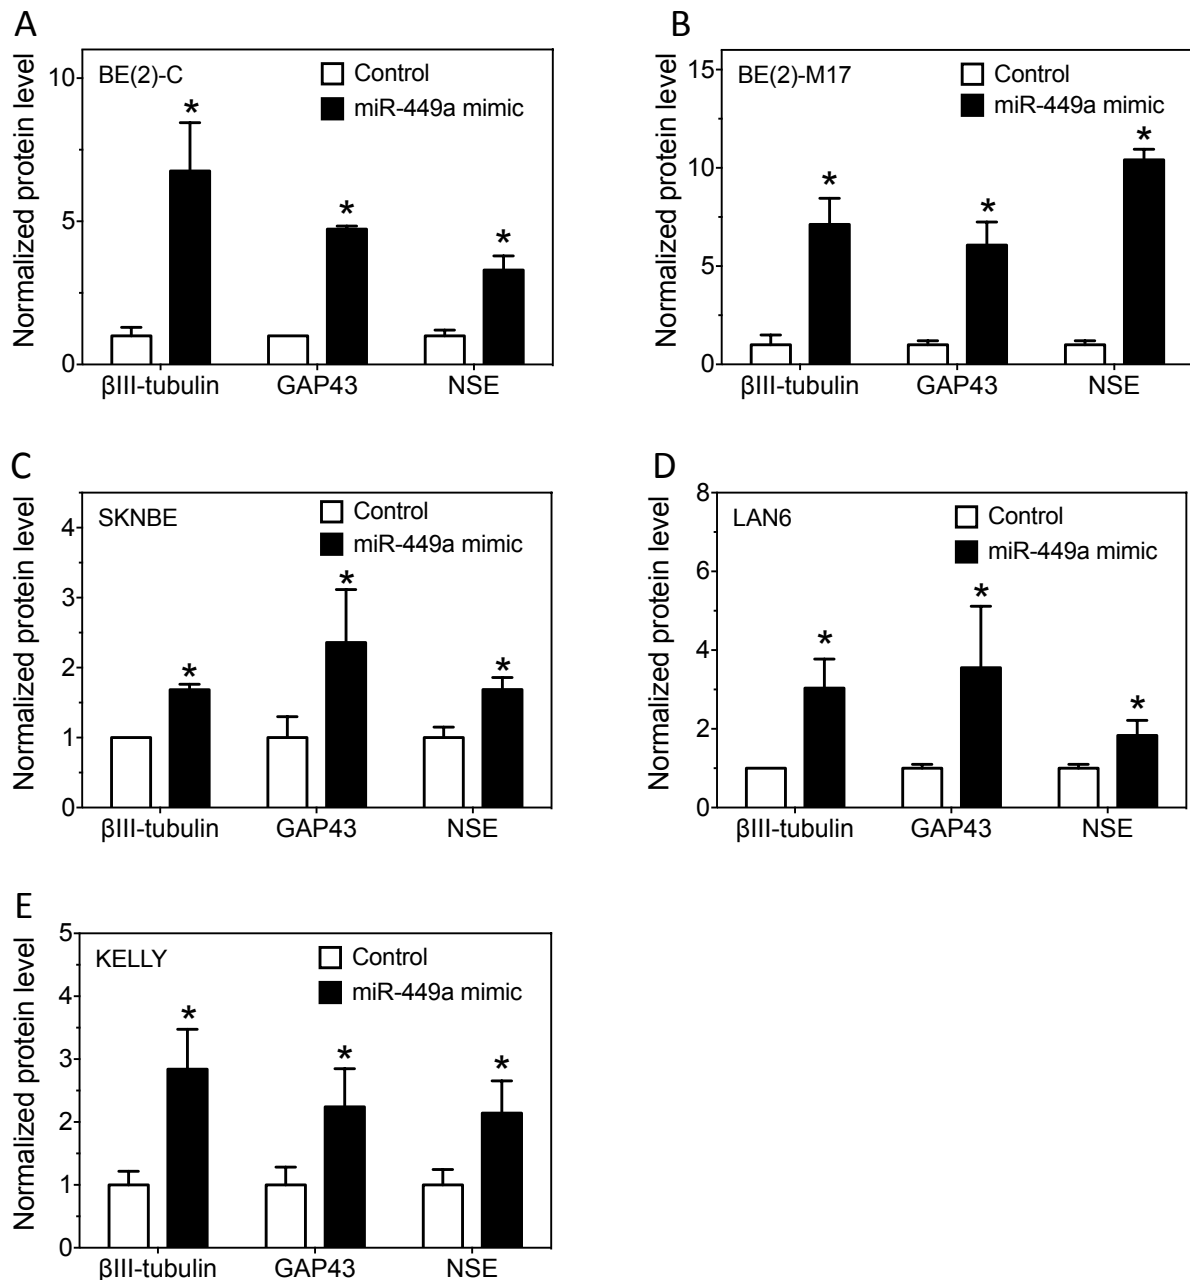

**Suppl. Figure 1. Effect of miR-449a mimic on protein expression levels of differentiation markers in multiple neuroblastoma cell lines.** Cells were treated with 25 nM miR-449a mimic or control oligos (Control) for 4 days. Expression of differentiation markers βIII-tubulin, GAP43 and NSE were determined by Western blots with calnexin protein levels used as a loading control. Protein levels were determined by the band intensities quantified using Image J. The band intensities associated with the differentiation markers were normalized to those associated with calnexin to allow comparison between samples. Shown are the average results from three independent experiments. \*,  $p < 0.05$ , comparing to Control.
