# Supplementary material
Source: publisher figshare collection journal article supplement (https://tandf.figshare.com/articles/dataset/_/1332512)
Supplement: Supplementary file 7 [file 1]

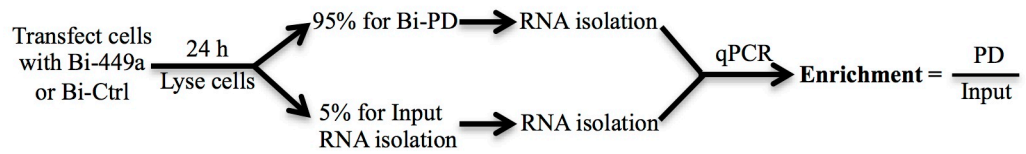

**Suppl. Figure 7. Summary of the protocol for the Biotinylated-miR-449a pulldown assay.** Bi, biotin; PD, pulldown; ctrl, control; Bi-449a, Biotinylated-miR-449a.
