# Supplementary material
Source: publisher figshare collection journal article supplement (https://tandf.figshare.com/articles/dataset/_/1332512)
Supplement: Supplementary file 8 [file 1]

| Gene    | Expression |
|---------|------------|
| MFAP4   | 0.357      |
| UNG     | 0.472      |
| LEF1    | 0.475      |
| CCNE2   | 0.481      |
| HDAC1   | 0.490      |
| TPD52   | 0.497      |
| CDK6    | 0.502      |
| RAD23B  | 0.506      |
| GIN53   | 0.515      |
| RIMS3   | 0.517      |
| SHMT1   | 0.536      |
| HMMR    | 0.538      |
| DPYSL4  | 0.542      |
| FAM167A | 0.545      |
| CASP2   | 0.553      |
| CDC25A  | 0.556      |
| PER2    | 0.557      |
| PKP4    | 0.558      |
| STMN1   | 0.566      |
| TGIF2   | 0.570      |
| PALLD   | 0.570      |
| TSEN15  | 0.576      |
| TMTC3   | 0.584      |
| FLOT2   | 0.585      |
| NAP1L1  | 0.588      |

**Suppl. Table 2. The 25 targets genes of miR-449a that are down-regulated by >40% at mRNA levels by miR-449a mimic.** Shown are the gene symbol, fold change of expression at mRNA level induced by miR-449a mimic.
