# Supplementary material
Source: publisher figshare collection journal article supplement (https://tandf.figshare.com/articles/dataset/_/1332512)
Supplement: Supplementary file 9 [file 1]

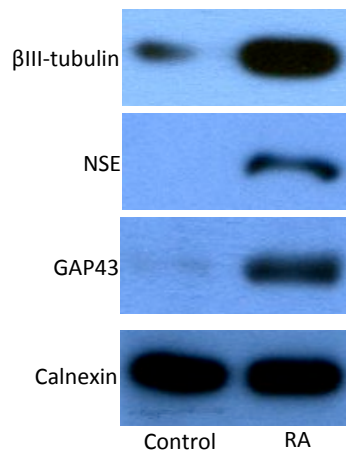

**Suppl. Figure 2. Expression of differentiation markers in BE(2)-C cells that were induced into differentiation by RA.** BE(2)-C cells were treated with 10  $\mu$ M of RA or the carrier DMSO (Control) for 5 days to induce cell differentiation. Protein levels of differentiation markers  $\beta$ III-tubulin, NSE and GAP43, were determined by Western blot, with calnexin protein levels used as a loading control. RA, 13-*cis*-Retinoic Acid.
