# Supplementary material
Source: publisher figshare collection journal article supplement (https://tandf.figshare.com/articles/dataset/_/1332512)
Supplement: Supplementary file 10 [file 1]

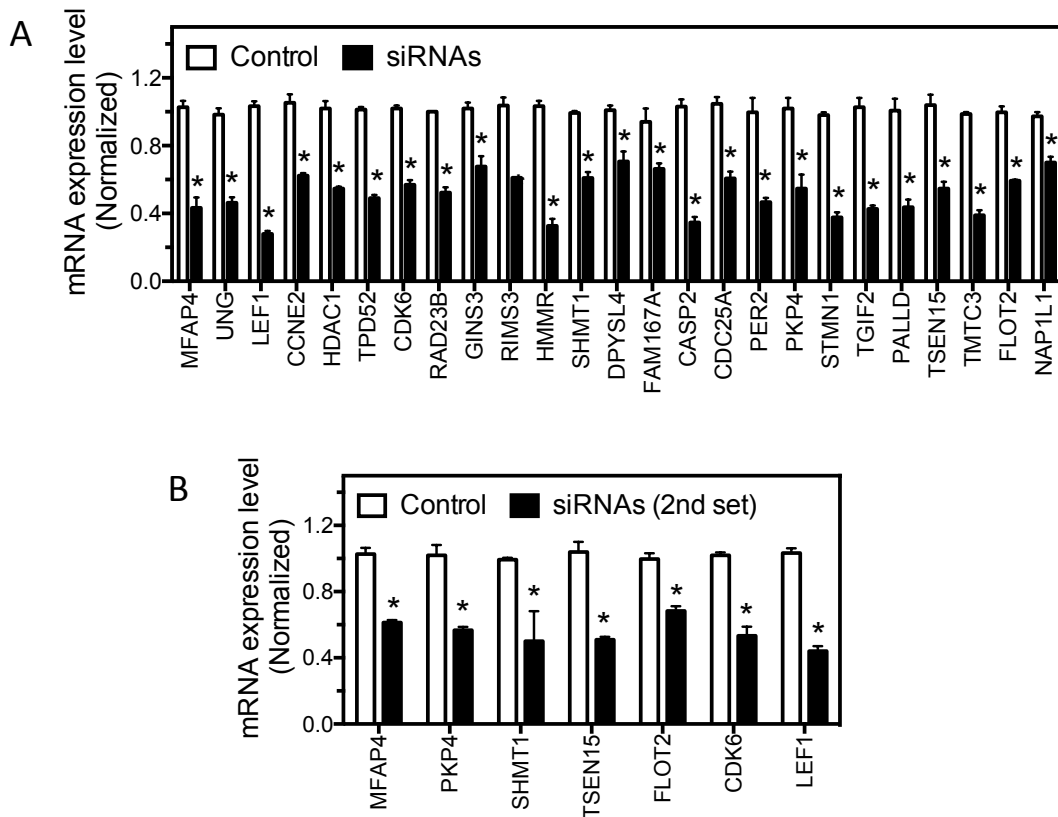

**Suppl. Figure 4. Confirmation of gene knockdown by siRNAs.** We used qPCR to confirm the the knockdown of the predicated target genes of miR-449a by siRNAs. BE(2)-C cells were transfected with the siRNAs or control oligos (Control) for 48 hours. Total RNAs were collected and the mRNA levels were measured by qPCR. Shown are the relative mRNA levels of the individual genes associated with the siRNAs of the corresponding genes normalized to those associated with the Control for the first (A) and second set (B) siRNAs. GAPDH was used as a loading control. \*,  $p < 0.05$  comparing to control.
